# Supplementary material for: Identification of Five Hub Genes as Key Prognostic Biomarkers in Liver Cancer via Integrated Bioinformatics Analysis
Source: MDPI journal article supplement (doi:10.3390/biology10100957), 2021-09-24
Supplement: s1 [file s1]

# Identification of five hub genes as key prognostic biomarkers in liver cancer via integrated bioinformatics analysis

Supporting figures:

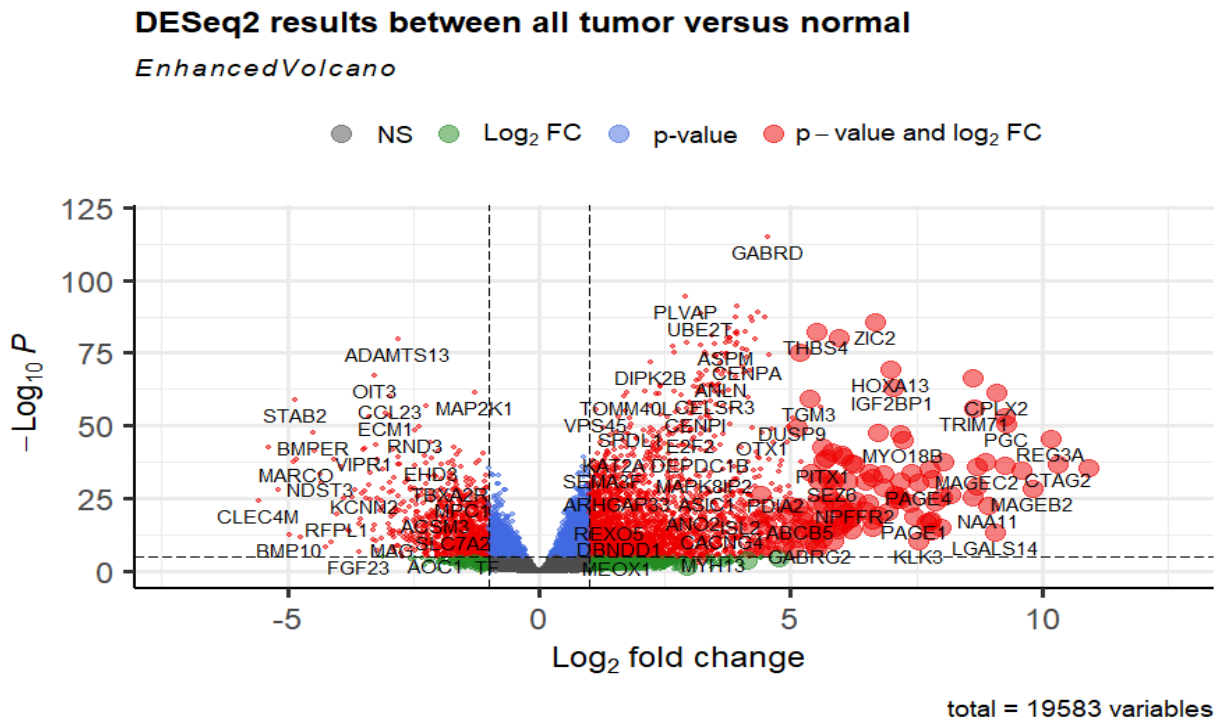

**Figure S1:** Volcano map of genes differentially expressed between liver cancer and normal samples from TCGA data. The x-axis represents the corrected p-value (scale conversion using logarithm), and the y-axis represents the fold change (log2FC). Each dot in the figure represents a gene; red or green dots represent genes that are significantly upregulated or downregulated, respectively, and black dots represent genes that have no differences in expression between cancer samples and healthy controls.

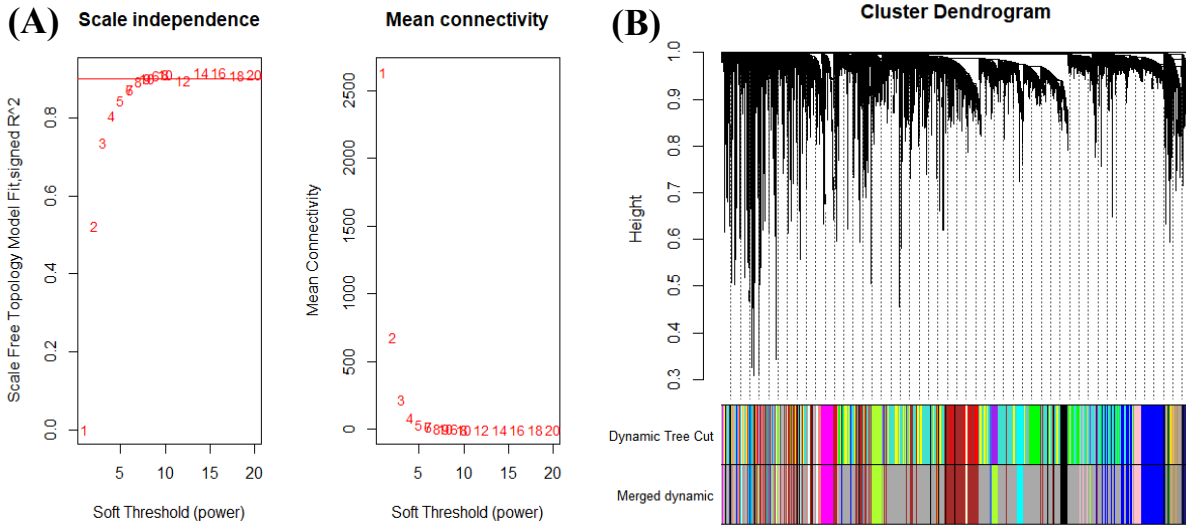

**Figure S2:** Determination of soft-thresholding power in weighted gene co-expression network analysis (WGCNA) analysis; **(A)** The scale-free fit index for various soft-thresholding powers  $\beta$  and the mean connectivity for various soft-thresholding powers. **(B)** A gene clustering tree (cluster dendrogram) produced by hierarchical clustering of adjacency-based dissimilarity. The colored row below the dendrogram indicates module membership identified by the dynamic tree cut method. The height represents similarity, and the correlation between height and similarity is negative. Each color represents a module, and each vertical line represents a gene. Twenty-six modules were identified.



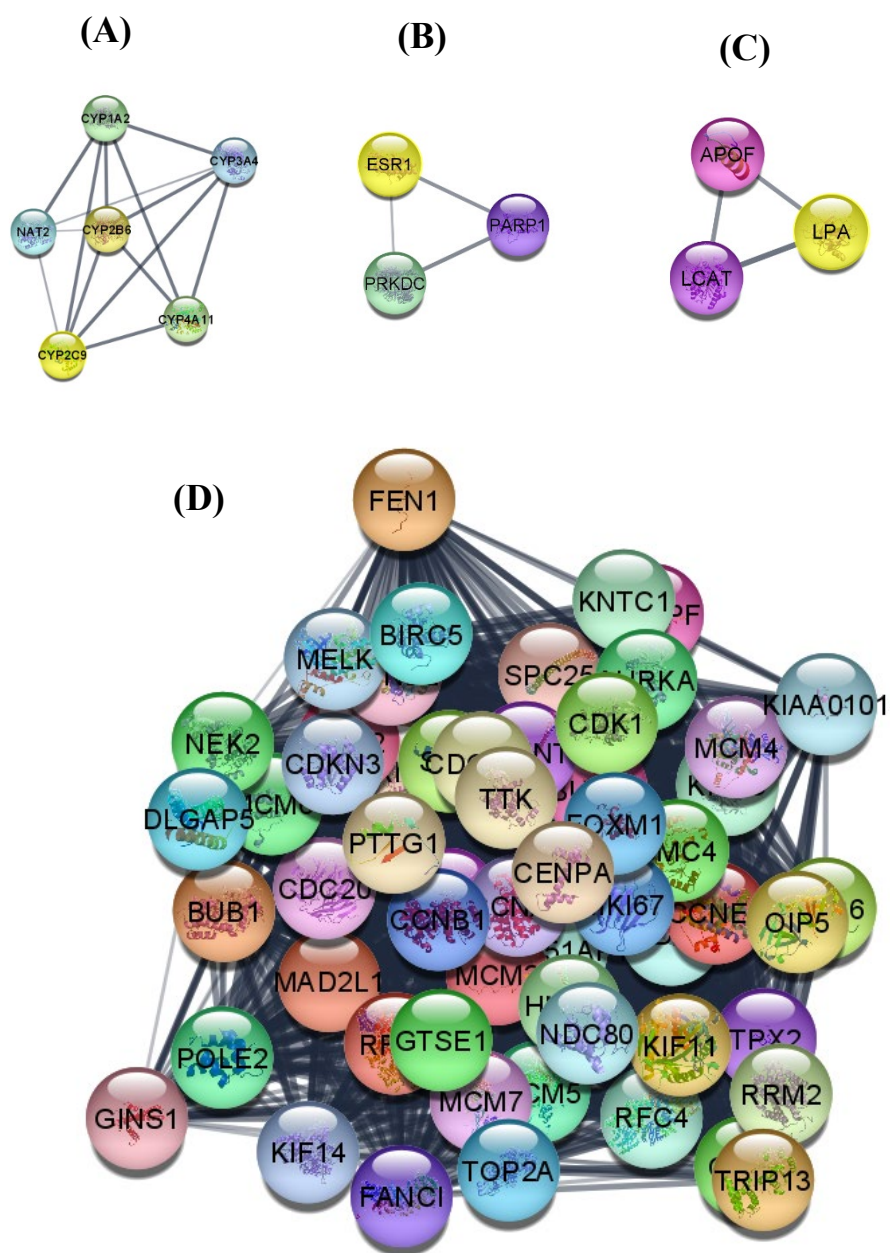

**Figure S4:** Modules of protein-protein interaction (PPI) network. Four modules (A-D) were identified by Cytoscape.

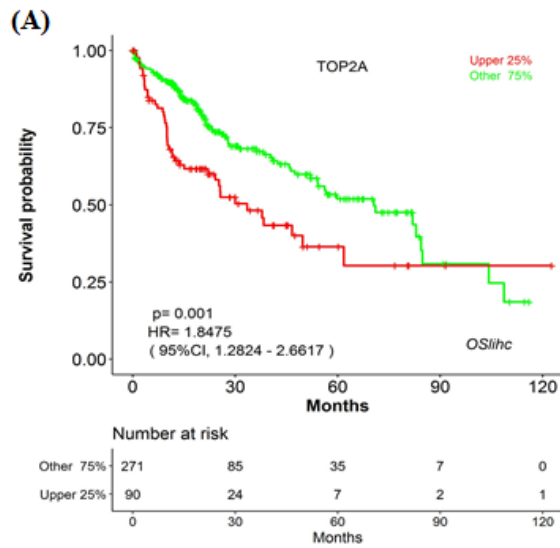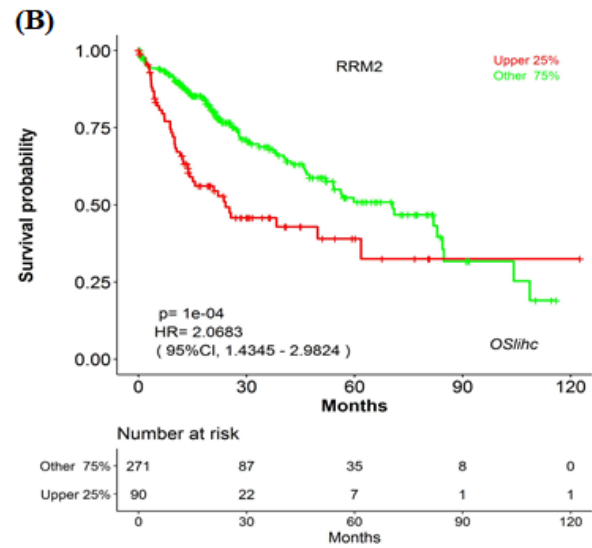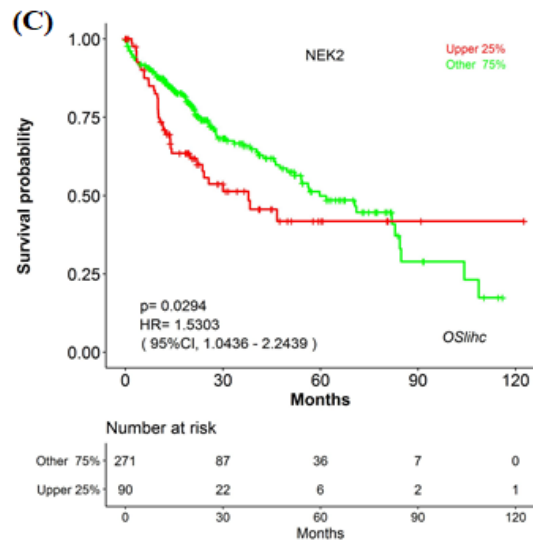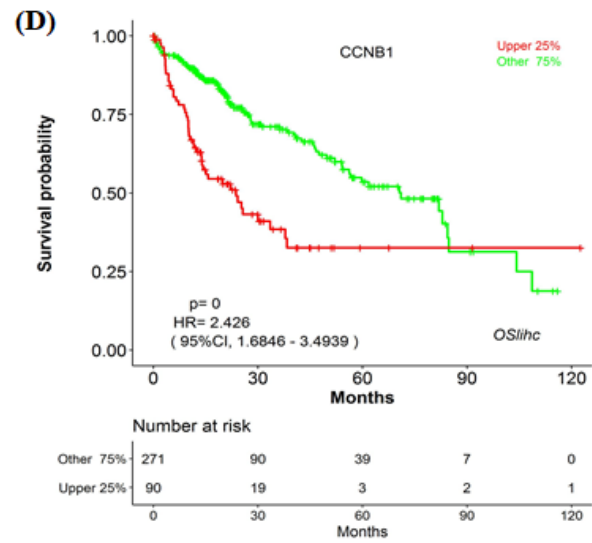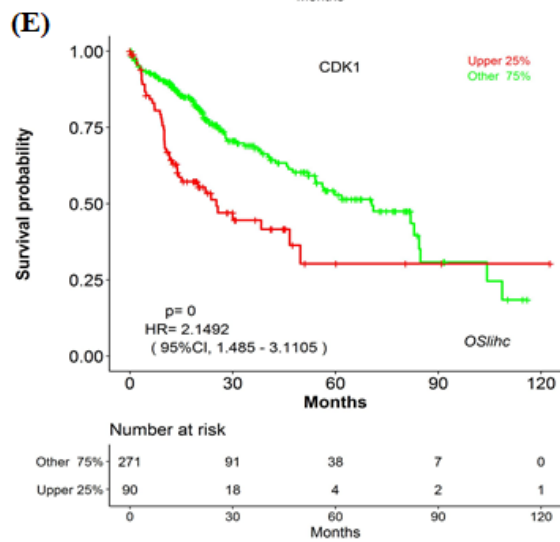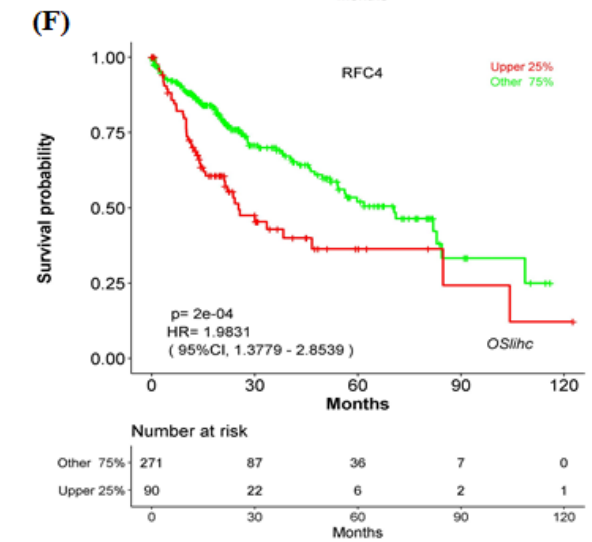

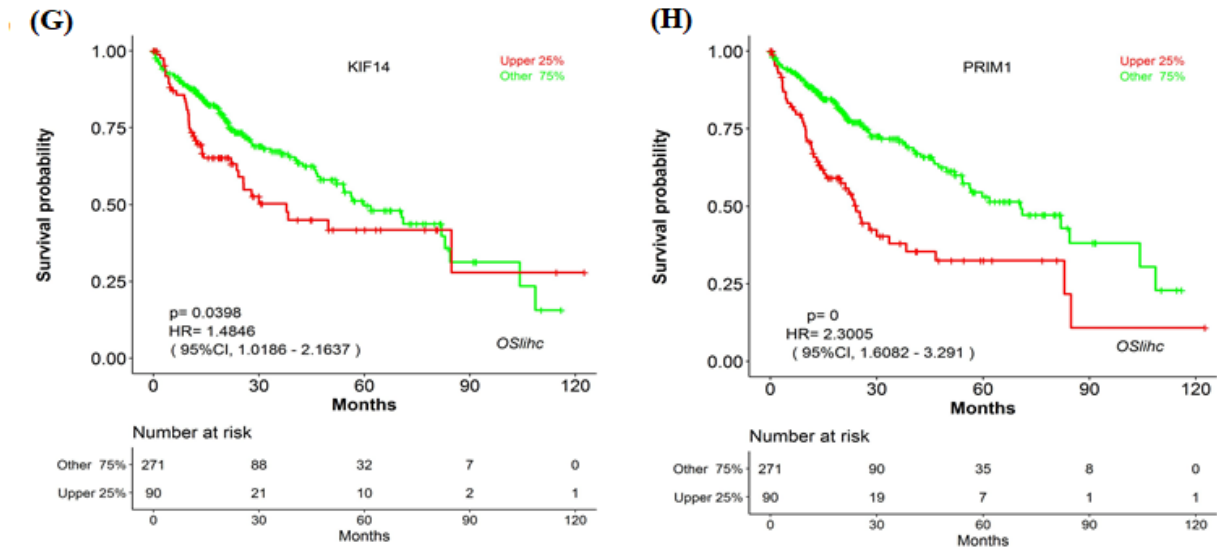

**Figure S5:** Survival analysis of five hub genes and three other genes of the top ten genes with the highest intramodular connectivity in HCC in OSlihc. The x-axis represents survival time (months) and the y-axis represents survival rate.  $p = 0$  indicates  $p < 0.0001$ . **(A)** *TOP2A*; **(B)** *RRM2*; **(C)** *NEK2*; **(D)** *CCNB1*; **(E)** *CDK1*; **(F)** *RFC4*; **(G)** *KIF14*; **(H)** *PRIM1*.





## Supporting tables:

**Table S1:** Comparison of the log2(count) values of the top ten Kin genes of HCC patients versus control.

| Genes           | Control           | HCC Patient       | <i>p value</i>           |                  | FC    |
|-----------------|-------------------|-------------------|--------------------------|------------------|-------|
|                 | ( <i>n</i> = 220) | ( <i>n</i> = 225) | Wilcoxon rank sum t test | Permutation test |       |
| <i>CENPA</i>    | 1.85±0.09         | 2.25±0.27         | 1.17E-58                 | <0.0001          | 1.313 |
| <i>DBF4</i>     | 2.06±0.10         | 2.43±0.21         | 5.17E-61                 | <0.0001          | 1.293 |
| <i>H2AFX</i>    | 2.50±0.11         | 2.87±0.18         | 3.11E-63                 | <0.0001          | 1.291 |
| <i>KIAA1794</i> | 1.95±0.1          | 2.32±0.24         | <2E-16                   | <0.0001          | 1.294 |
| <i>KIF14</i>    | 1.90±0.10         | 2.22±0.22         | 3.57E-52                 | <0.0001          | 1.249 |
| <i>NEK2</i>     | 1.86±0.10         | 2.41±0.29         | 6.33E-67                 | <0.0001          | 1.468 |
| <i>PRIM1</i>    | 2.09±0.12         | 2.52±0.23         | 8.58E-57                 | <0.0001          | 1.341 |
| <i>RFC4</i>     | 2.27±0.14         | 2.80±0.23         | 7.28E-63                 | <0.0001          | 1.443 |
| <i>RRM2</i>     | 1.94±0.23         | 2.77±0.32         | 1.65E-64                 | <0.0001          | 1.785 |
| <i>TOP2A</i>    | 1.94±0.18         | 2.75±0.35         | 2.60E-63                 | <0.0001          | 1.686 |

Data were presented as mean ± SD of the log2(count); HCC: Hepatocellular carcinoma, FC: Fold change.

**Table S2:** Degree of proteins in protein-protein network by Cytoscape.

| Protein | Degree | Protein | Degree |
|---------|--------|---------|--------|
| CDK1    | 70     | MSH2    | 36     |
| CCNB1   | 68     | DBF4    | 35     |
| TOP2A   | 67     | STIL    | 35     |
| CCNA2   | 65     | ESR1    | 23     |
| MAD2L1  | 65     | TUBG1   | 23     |
| RFC4    | 65     | NUP155  | 20     |
| AURKA   | 64     | STMN1   | 20     |
| BUB1B   | 64     | PARP1   | 19     |
| CDC20   | 64     | PRKDC   | 17     |
| CCNB2   | 63     | GMPS    | 12     |
| KIF11   | 63     | NUP205  | 12     |
| MCM4    | 62     | TUBA1B  | 12     |
| BIRC5   | 61     | FOS     | 11     |



|          |    |          |   |
|----------|----|----------|---|
| BUB1     | 61 | CYP3A4   | 8 |
| CDC6     | 61 | CCT3     | 7 |
| NDC80    | 61 | WHSC1    | 7 |
| TPX2     | 61 | CYP1A2   | 6 |
| CDKN3    | 60 | CYP2B6   | 6 |
| FEN1     | 60 | CYP2C9   | 5 |
| MCM2     | 60 | SNRPD1   | 5 |
| MCM3     | 60 | CYP4A11  | 4 |
| RRM2     | 60 | EGR1     | 4 |
| TTK      | 60 | NAT2     | 4 |
| FANCI    | 59 | CPEB3    | 3 |
| KIF2C    | 59 | FYN      | 3 |
| SMC4     | 59 | SAC3D1   | 3 |
| CENPA    | 58 | APOF     | 2 |
| DLGAP5   | 58 | CPSF6    | 2 |
| MCM7     | 58 | LCAT     | 2 |
| MELK     | 58 | LPA      | 2 |
| POLE2    | 58 | SRD5A2   | 2 |
| TRIP13   | 58 | SRPX     | 2 |
| MCM6     | 57 | VIPR1    | 2 |
| ZWINT    | 57 | ADRA1A   | 1 |
| CENPF    | 56 | CRHBP    | 1 |
| PTTG1    | 56 | FCN2     | 1 |
| RAD51AP1 | 56 | FCN3     | 1 |
| KNTC1    | 55 | PTH1R    | 1 |
| KIAA0101 | 54 | UCK2     | 1 |
| MKI67    | 54 | C7       | 0 |
| OIP5     | 54 | CLEC4M   | 0 |
| MCM5     | 53 | DCN      | 0 |
| PRIM1    | 53 | DNASE1L3 | 0 |

|          |    |         |   |
|----------|----|---------|---|
| FOXMI    | 52 | ECMI    | 0 |
| HMMR     | 52 | F11     | 0 |
| CDC25C   | 51 | GPD1    | 0 |
| NEK2     | 51 | GSTZ1   | 0 |
| RFC3     | 51 | GYS2    | 0 |
| SPC25    | 50 | IGFALS  | 0 |
| CKS2     | 49 | MAN1C1  | 0 |
| KIF14    | 49 | MDK     | 0 |
| CCNE2    | 48 | N4BP2L1 | 0 |
| CDC7     | 47 | NDRG2   | 0 |
| EZH2     | 47 | PER1    | 0 |
| GTSE1    | 45 | PSPH    | 0 |
| GINS1    | 40 | RDH5    | 0 |
| RNASEH2A | 39 |         |   |
| H2AFX    | 36 |         |   |

**Table S3:** The association of the hub genes and overall survival in the TCGA\_LIHC dataset.

| Symbol       | Univariate Cox regression analysis |             |         |
|--------------|------------------------------------|-------------|---------|
|              | HR                                 | 95% CI      | p-value |
| <i>CCNB1</i> | 1.958                              | (1.37-2.80) | <0.001  |
| <i>CDK1</i>  | 1.751                              | (1.23-2.49) | 0.002   |
| <i>KIF14</i> | 1.627                              | (1.15-2.31) | 0.006   |
| <i>NEK2</i>  | 2.057                              | (1.44-2.94) | <0.001  |
| <i>PRIM1</i> | 1.549                              | (1.10-2.19) | 0.013   |
| <i>RFC4</i>  | 1.812                              | (1.28-2.58) | <0.001  |
| <i>RRM2</i>  | 1.769                              | (1.25-2.51) | 0.001   |
| <i>TOP2A</i> | 1.715                              | (1.21-2.43) | 0.002   |

HR: Hazard ratio; CI: confident interval; TCGA: The Cancer Genome Atlas; LIHC: Liver Hepatocellular Carcinoma
